# Supplementary material for: Maternal First-Trimester Cow-Milk Intake Is Positively Associated with Childhood General and Abdominal Visceral Fat Mass and Lean Mass but Not with Other Cardiometabolic Risk Factors at the Age of 10 Years
Source: PubMed Central journal article supplement — J Nutr. 2021 Mar 23;151(7):1965–75. doi: 10.1093/jn/nxab047 (PMC8245880; doi:10.1093/jn/nxab047), 2021-03-23
Supplement: nxab047_supplemental_file.pdf [file nxab047_supplemental_file.pdf]

**Online Supplementary Material**

**Maternal first trimester cow's milk intake is positively associated with  
childhood general- and abdominal visceral fat mass and lean mass but not  
with other cardio-metabolic risk factors at the age of 10 years**

Ellis Voerman MSc, Romy Gaillard MD, PhD,

Madelon L. Geurtsen MD, Vincent WV Jaddoe MD, PhD

The Generation R Study Group, Erasmus MC, University Medical Center, Rotterdam, the Netherlands  
(EV, RG, MLG, VWVJ).

Department of Pediatrics, Erasmus MC, University Medical Center, Rotterdam, the Netherlands (EV, RG,  
MLG, VWVJ).

**Address correspondence to:** Vincent Jaddoe, MD, PhD. The Generation R Study Group (Room Na-  
2908). Erasmus MC, University Medical Center, PO Box 2040, 3000 CA Rotterdam, the Netherlands.  
email: v.jaddoe@erasmusmc.nl; phone: +31 10 70 43405

**Supplemental Figure 1. Flow-chart of the participants**

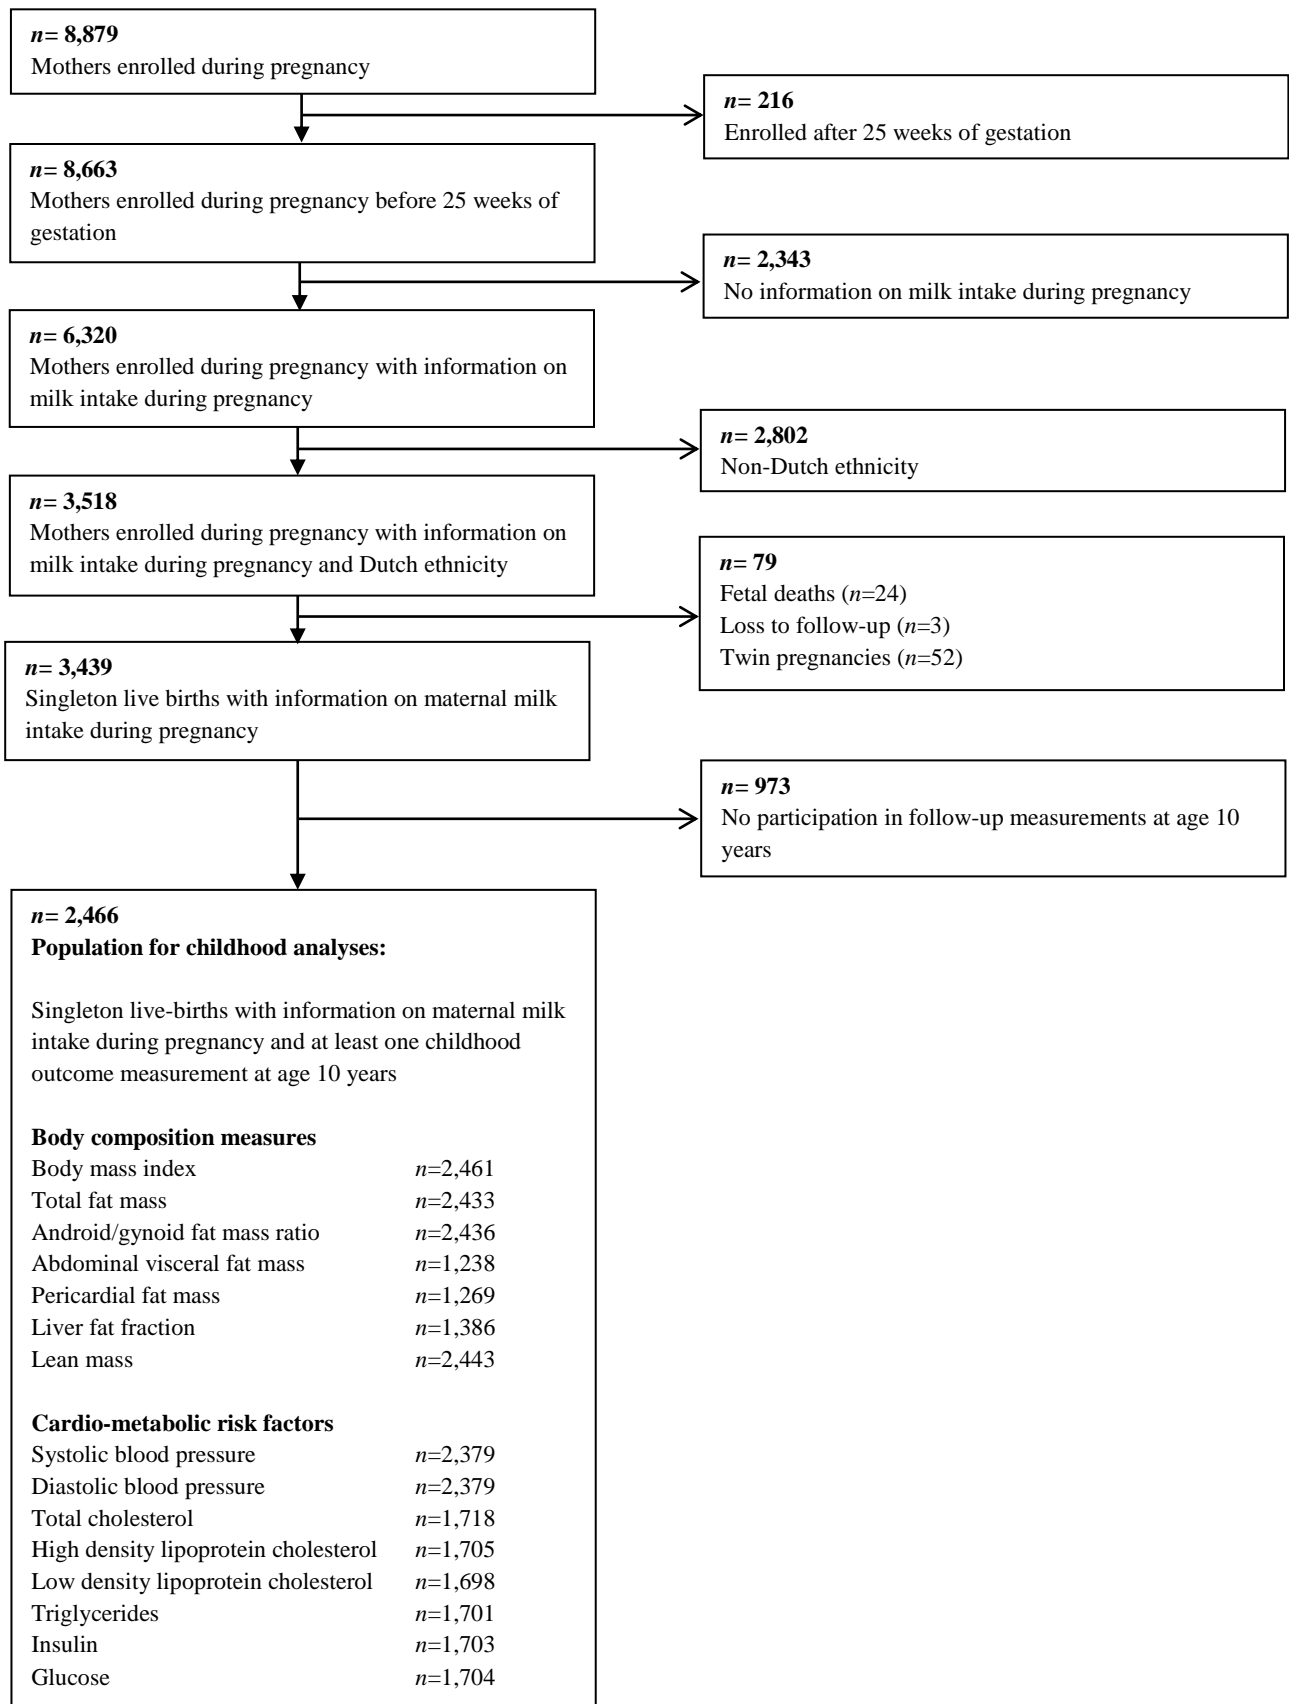

### **Supplemental Methods 1. Log-log regression analyses**

As the amount of fat and lean mass is highly dependent on the current height of the child, we created measures of fat and lean mass that are independent of height using log-log regression analyses. We log-transformed total fat mass, abdominal visceral fat mass, pericardial fat mass, lean mass and height, using natural logs. We subsequently regressed the log-adiposity measures on log-height. The regression slope corresponds to the power by which height should be raised in order to calculate an index of the a measure that is uncorrelated with height. Thus, we divided total fat mass by height<sup>4</sup>, abdominal visceral fat mass by height<sup>3</sup>, pericardial fat mass by height<sup>3</sup> and lean mass by height<sup>2</sup>.

### **References**

1. Wells JC, Cole TJ, ALSPAC study team. Adjustment of fat-free mass and fat mass for height in children aged 8 y. *Int J Obes Relat Metab Disord* 2002; 26: 947-952.

**Supplemental Table 1. Non-response analysis**

|                                                      | <b>Follow-up at 10 years</b> | <b>Lost to follow-up at 10 years</b> | <b>P-value</b> |
|------------------------------------------------------|------------------------------|--------------------------------------|----------------|
|                                                      | <b><i>n</i>= 2,466</b>       | <b><i>n</i>= 973</b>                 |                |
| <b>Maternal characteristics</b>                      |                              |                                      |                |
| Milk intake during pregnancy, glasses/d              | 1.6 [0.0, 5.3]               | 2.0 [0.0, 5.6]                       | 0.036          |
| Age, years                                           | 31.9 [22.7, 39.7]            | 31.0 [19.8, 38.7]                    | <0.001         |
| Pre-pregnancy BMI, kg/m <sup>2</sup>                 | 23.2 (3.8)                   | 23.3 (4.2)                           | 0.307          |
| Education, <i>n</i> (%)                              |                              |                                      | <0.001         |
| Primary                                              | 38 (1.6)                     | 70 (7.3)                             |                |
| Secondary                                            | 842 (34.6)                   | 431 (44.9)                           |                |
| Higher                                               | 1556 (63.9)                  | 458 (47.8)                           |                |
| Nulliparous, <i>n</i> (%)                            | 1540 (62.6)                  | 523 (54.0)                           | <0.001         |
| Folic acid supplementation use, <i>n</i> (%)         | 1850 (91.5)                  | 661 (83.2)                           | <0.001         |
| Smoking during pregnancy, <i>n</i> (%)               | 290 (12.7)                   | 244 (26.8)                           | <0.001         |
| Total energy intake, kcal/d                          | 2127 [1227, 3174]            | 2132 [1203, 3265]                    | 0.920          |
| Caffeine intake during pregnancy, units <sup>2</sup> | 1.9 [0.0, 5.5]               | 1.8 [0.0, 5.6]                       | 0.055          |
| Fruit intake, g/d                                    | 190 [21, 473]                | 182 [187, 469]                       | 0.005          |
| Vegetable intake, g/d                                | 149 [54, 304]                | 143 [47, 304]                        | 0.004          |
| Meat intake, g/d                                     | 83 [1, 166]                  | 86 [1, 173]                          | 0.066          |
| Fish intake, g/d                                     | 12 [0, 45]                   | 10 [0, 48]                           | 0.001          |
| Daily vomiting, <i>n</i> (%)                         | 93 (4.1)                     | 52 (5.8)                             | 0.056          |
| Daily nausea, <i>n</i> (%)                           | 619 (27.5)                   | 261 (29.0)                           | 0.429          |
| <b>Child characteristics</b>                         |                              |                                      |                |
| Males, <i>n</i> (%)                                  | 1225 (49.7)                  | 511 (52.5)                           | 0.143          |
| Gestational age at birth, weeks                      | 40.3 [36, 42.4]              | 40.1 [35.3, 42.3]                    | 0.003          |
| Birth weight, g                                      | 3530 [2335, 4500]            | 3450 [2202, 4639]                    | 0.034          |
| Gestational age-adjusted birth weight, SD            | 0.0 (1.0)                    | 0.0 (1.1)                            | 0.645          |
| Ever breastfeeding, <i>n</i> (%)                     | 1985 (91.9)                  | 578 (85.8)                           | <0.001         |

<sup>1</sup>Values represent mean (SD), median [95% range] or number of participants (valid %) unless otherwise indicated.

<sup>2</sup>1 unit is equivalent to one cup of coffee (90 mg of caffeine).

**Supplemental Table 2. Associations of maternal first trimester milk intake with childhood fat and lean mass at the age of 10 years** <sup>1,2,3</sup>

|                                 | Body mass index (SD) |          | Fat mass index (SD) |          | Lean mass index (SD) |          | Android/gynoid fat mass ratio (SD) |          | Abdominal visceral fat mass index (SD) |          | Liver fat fraction (SD) |          |
|---------------------------------|----------------------|----------|---------------------|----------|----------------------|----------|------------------------------------|----------|----------------------------------------|----------|-------------------------|----------|
|                                 | <i>n</i> =2,461      | <i>n</i> | <i>n</i> =2,433     | <i>n</i> | <i>n</i> =2,443      | <i>n</i> | <i>n</i> =2,436                    | <i>n</i> | <i>n</i> =1,238                        | <i>n</i> | <i>n</i> =1,386         | <i>n</i> |
| <b>Maternal milk intake</b>     |                      |          |                     |          |                      |          |                                    |          |                                        |          |                         |          |
| 0-0.9 glass                     | Reference            | 662      | Reference           | 651      | Reference            | 651      | Reference                          | 652      | Reference                              | 339      | Reference               | 380      |
| 1-1.9 glasses                   | 0.09 (-0.01, 0.19)   | 637      | 0.06 (-0.04, 0.17)  | 631      | 0.06 (-0.04, 0.16)   | 631      | 0.07 (-0.04, 0.18)                 | 632      | -0.02 (-0.17, 0.13)                    | 330      | -0.02 (-0.16, 0.12)     | 368      |
| 2-2.9 glasses                   | 0.11 (0.01, 0.21)*   | 691      | 0.10 (0.00, 0.20)   | 687      | 0.06 (-0.04, 0.16)   | 687      | 0.07 (-0.04, 0.17)                 | 687      | 0.04 (-0.11, 0.19)                     | 336      | 0.08 (-0.06, 0.22)      | 379      |
| 3-3.9 glasses                   | 0.08 (-0.05, 0.21)   | 269      | 0.07 (-0.06, 0.21)  | 265      | 0.05 (-0.09, 0.18)   | 265      | 0.05 (-0.09, 0.19)                 | 266      | -0.09 (-0.28, 0.11)                    | 140      | -0.01 (-0.19, 0.18)     | 152      |
| 4-4.9 glasses                   | 0.14 (-0.06, 0.34)   | 94       | 0.26 (0.05, 0.46)*  | 93       | -0.05 (-0.25, 0.15)  | 93       | 0.11 (-0.11, 0.32)                 | 93       | -0.01 (-0.33, 0.32)                    | 40       | 0.30 (0.00, 0.60)*      | 47       |
| ≥5 glasses                      | 0.25 (0.06, 0.44)**  | 108      | 0.23 (0.03, 0.42)*  | 106      | 0.26 (0.07, 0.46)**  | 106      | 0.27 (0.07, 0.48)**                | 106      | 0.30 (0.01, 0.59)*                     | 53       | 0.13 (-0.14, 0.40)      | 60       |
| <i>P</i> for trend <sup>4</sup> | 0.007**              |          | 0.003**             |          | NA <sup>5</sup>      |          | 0.028*                             |          | NA <sup>5</sup>                        |          | NA <sup>5</sup>         |          |

<sup>1</sup>Values are differences in childhood outcomes in standard deviations (95% Confidence Interval) between children whose mothers consumed 1-1.9, 2-2.9, 3-3.9, 4-4.9, and ≥5 glasses of milk per day, respectively, as compared to those whose mothers consumed 0-0.9 glasses of milk per day.

<sup>2</sup>1 glass is equivalent to 150 mL milk.

<sup>3</sup>The models are adjusted for child's sex and child's age at follow-up measurement.

<sup>4</sup>*P*-values for trend were obtained from models in which the categorized milk intake variable was entered as continuous variable.

<sup>5</sup>Not applicable: secondary analysis not performed as results from primary analysis are not linear.

\**P*-value < 0.05 \*\**P*-value < 0.0125 (Bonferroni corrected *P*-value)

**Supplemental Table 3. Associations of maternal first trimester milk intake with childhood fat pericardial fat at the age of 10 years** <sup>1,2,3</sup>

|                                 | Pericardial fat mass index (SD) |          |                        |          |                        |          |
|---------------------------------|---------------------------------|----------|------------------------|----------|------------------------|----------|
|                                 | Total group<br><i>n</i> =1,269  | <i>n</i> | Boys<br><i>n</i> =626  | <i>n</i> | Girls<br><i>n</i> =643 | <i>n</i> |
| <b>Maternal milk intake</b>     |                                 |          |                        |          |                        |          |
| 0-0.9 glass                     | Reference                       | 346      | Reference              | 165      | Reference              | 181      |
| 1-1.9 glasses                   | -0.01 (-0.16, 0.14)             | 336      | -0.24 (-0.46, -0.02)*  | 160      | 0.17 (-0.03, 0.38)     | 176      |
| 2-2.9 glasses                   | 0.00 (-0.15, 0.14)              | 356      | -0.11 (-0.32, 0.10)    | 191      | 0.07 (-0.14, 0.28)     | 165      |
| 3-3.9 glasses                   | -0.09 (-0.29, 0.10)             | 140      | -0.39 (-0.67, -0.11)** | 70       | 0.17 (-0.10, 0.44)     | 70       |
| 4-4.9 glasses                   | 0.01 (-0.33, 0.34)              | 39       | -0.67 (-1.26, -0.08)*  | 12       | 0.35 (-0.05, 0.75)     | 27       |
| ≥5 glasses                      | 0.24 (-0.05, 0.53)              | 52       | -0.08 (-0.48, 0.33)    | 28       | 0.55 (0.13, 0.97)**    | 24       |
| <i>P</i> for trend <sup>4</sup> | NA <sup>5</sup>                 |          | NA <sup>5</sup>        |          | 0.014*                 |          |

<sup>1</sup>Values are differences in childhood outcomes in standard deviations (95% Confidence Interval) between children whose mothers consumed 1-1.9, 2-2.9, 3-3.9, 4-4.9, and ≥5 glasses of milk per day, respectively, as compared to those whose mothers consumed 0-0.9 glasses of milk per day.

<sup>2</sup>1 glass is equivalent to 150 mL milk.

<sup>3</sup>The models are adjusted for child's sex and child's age at follow-up measurement.

<sup>4</sup>*P*-values for trend were obtained from models in which the categorized milk intake variable was entered as continuous variable.

<sup>5</sup> Not applicable: secondary analysis not performed as results from primary analysis are not linear.

\**P*-value < 0.05 \*\**P*-value < 0.0125 (Bonferroni corrected *P*-value)

Supplemental Table 4. Associations of maternal first trimester milk intake with childhood fat and lean mass at the age of 10 years<sup>1,2,3</sup>

|                                                                    | Body mass index (SD) |          | Fat mass index (SD) |          | Lean mass index (SD) |          | Android/gynoid fat mass ratio (SD) |          | Abdominal visceral fat mass index (SD) |          | Liver fat fraction (SD) |          |
|--------------------------------------------------------------------|----------------------|----------|---------------------|----------|----------------------|----------|------------------------------------|----------|----------------------------------------|----------|-------------------------|----------|
|                                                                    | <i>n</i> =2,461      | <i>n</i> | <i>n</i> =2,433     | <i>n</i> | <i>n</i> =2,443      | <i>n</i> | <i>n</i> =2,436                    | <i>n</i> | <i>n</i> =1,238                        | <i>n</i> | <i>n</i> =1,386         | <i>n</i> |
| <b>A. Confounder model + gestational age-adjusted birth weight</b> |                      |          |                     |          |                      |          |                                    |          |                                        |          |                         |          |
| 0-0.9 glass                                                        | Reference            | 662      | Reference           | 651      | Reference            | 651      | Reference                          | 652      | Reference                              | 339      | Reference               | 380      |
| 1-1.9 glasses                                                      | 0.09 (-0.01, 0.19)   | 637      | 0.08 (-0.02, 0.19)  | 631      | 0.03 (-0.07, 0.13)   | 631      | 0.09 (-0.02, 0.2)                  | 632      | 0.00 (-0.15, 0.15)                     | 330      | 0.00 (-0.14, 0.14)      | 368      |
| 2-2.9 glasses                                                      | 0.11 (0.01, 0.20)*   | 691      | 0.12 (0.01, 0.22)*  | 687      | 0.03 (-0.07, 0.13)   | 687      | 0.08 (-0.03, 0.19)                 | 687      | 0.07 (-0.08, 0.22)                     | 336      | 0.10 (-0.04, 0.24)      | 379      |
| 3-3.9 glasses                                                      | 0.09 (-0.04, 0.23)   | 269      | 0.11 (-0.02, 0.25)  | 265      | 0.00 (-0.13, 0.13)   | 265      | 0.08 (-0.06, 0.23)                 | 266      | 0.00 (-0.20, 0.20)                     | 140      | 0.04 (-0.16, 0.23)      | 152      |
| 4-4.9 glasses                                                      | 0.15 (-0.05, 0.35)   | 94       | 0.28 (0.08, 0.49)** | 93       | -0.08 (-0.28, 0.12)  | 93       | 0.12 (-0.10, 0.34)                 | 93       | 0.06 (-0.27, 0.39)                     | 40       | 0.34 (0.03, 0.64)*      | 47       |
| ≥5 glasses                                                         | 0.26 (0.07, 0.45)**  | 108      | 0.27 (0.07, 0.46)** | 106      | 0.22 (0.03, 0.41)*   | 106      | 0.30 (0.09, 0.51)**                | 106      | 0.38 (0.09, 0.67)**                    | 53       | 0.19 (-0.09, 0.46)      | 60       |
| <i>P</i> for trend <sup>4</sup>                                    | 0.006**              |          | 0.001**             |          | NA <sup>5</sup>      |          | 0.014*                             |          | NA <sup>5</sup>                        |          | NA <sup>5</sup>         |          |
| <b>B. Confounder model + breastfeeding</b>                         |                      |          |                     |          |                      |          |                                    |          |                                        |          |                         |          |
| 0-0.9 glass                                                        | Reference            | 662      | Reference           | 651      | Reference            | 651      | Reference                          | 652      | Reference                              | 339      | Reference               | 380      |
| 1-1.9 glasses                                                      | 0.11 (0.01, 0.21)*   | 637      | 0.09 (-0.01, 0.19)  | 631      | 0.06 (-0.04, 0.16)   | 631      | 0.09 (-0.02, 0.20)                 | 632      | 0.00 (-0.15, 0.15)                     | 330      | -0.01 (-0.15, 0.13)     | 368      |
| 2-2.9 glasses                                                      | 0.13 (0.03, 0.23)**  | 691      | 0.12 (0.02, 0.22)*  | 687      | 0.06 (-0.04, 0.16)   | 687      | 0.08 (-0.03, 0.19)                 | 687      | 0.07 (-0.08, 0.22)                     | 336      | 0.09 (-0.05, 0.24)      | 379      |
| 3-3.9 glasses                                                      | 0.12 (-0.01, 0.26)   | 269      | 0.11 (-0.03, 0.25)  | 265      | 0.05 (-0.09, 0.18)   | 265      | 0.07 (-0.07, 0.22)                 | 266      | 0.00 (-0.20, 0.20)                     | 140      | 0.02 (-0.17, 0.22)      | 152      |
| 4-4.9 glasses                                                      | 0.16 (-0.04, 0.37)   | 94       | 0.28 (0.07, 0.48)** | 93       | -0.06 (-0.26, 0.15)  | 93       | 0.11 (-0.11, 0.33)                 | 93       | 0.05 (-0.28, 0.38)                     | 40       | 0.32 (0.02, 0.63)*      | 47       |
| ≥5 glasses                                                         | 0.29 (0.10, 0.49)**  | 108      | 0.28 (0.08, 0.47)** | 106      | 0.26 (0.07, 0.46)**  | 106      | 0.30 (0.09, 0.50)**                | 106      | 0.38 (0.09, 0.68)**                    | 53       | 0.17 (-0.11, 0.44)      | 60       |
| <i>P</i> for trend <sup>4</sup>                                    | 0.001**              |          | <0.001**            |          | NA <sup>5</sup>      |          | 0.015*                             |          | NA <sup>5</sup>                        |          | NA <sup>5</sup>         |          |
| <b>C. Confounder model + child's milk intake</b>                   |                      |          |                     |          |                      |          |                                    |          |                                        |          |                         |          |
| 0-0.9 glass                                                        | Reference            | 662      | Reference           | 651      | Reference            | 651      | Reference                          | 652      | Reference                              | 339      | Reference               | 380      |
| 1-1.9 glasses                                                      | 0.11 (0.01, 0.21)*   | 637      | 0.09 (-0.02, 0.19)  | 631      | 0.06 (-0.05, 0.16)   | 631      | 0.09 (-0.02, 0.20)                 | 632      | 0.00 (-0.15, 0.15)                     | 330      | -0.01 (-0.15, 0.13)     | 368      |
| 2-2.9 glasses                                                      | 0.12 (0.02, 0.23)*   | 691      | 0.12 (0.02, 0.22)*  | 687      | 0.05 (-0.05, 0.15)   | 687      | 0.08 (-0.03, 0.19)                 | 687      | 0.07 (-0.08, 0.22)                     | 336      | 0.09 (-0.05, 0.24)      | 379      |
| 3-3.9 glasses                                                      | 0.12 (-0.01, 0.26)   | 269      | 0.12 (-0.02, 0.26)  | 265      | 0.03 (-0.10, 0.17)   | 265      | 0.08 (-0.06, 0.23)                 | 266      | 0.01 (-0.20, 0.21)                     | 140      | 0.03 (-0.16, 0.22)      | 152      |
| 4-4.9 glasses                                                      | 0.16 (-0.04, 0.36)   | 94       | 0.29 (0.08, 0.50)** | 93       | -0.08 (-0.29, 0.13)  | 93       | 0.12 (-0.10, 0.34)                 | 93       | 0.06 (-0.26, 0.39)                     | 40       | 0.33 (0.03, 0.64)*      | 47       |
| ≥5 glasses                                                         | 0.28 (0.09, 0.48)**  | 108      | 0.28 (0.08, 0.47)** | 106      | 0.24 (0.05, 0.44)*   | 106      | 0.30 (0.10, 0.51)**                | 106      | 0.38 (0.09, 0.68)**                    | 53       | 0.17 (-0.10, 0.45)      | 60       |
| <i>P</i> for trend <sup>4</sup>                                    | 0.002**              |          | <0.001**            |          | NA <sup>5</sup>      |          | 0.012                              |          | NA <sup>5</sup>                        |          | NA <sup>5</sup>         |          |

<sup>1</sup>Values are differences in childhood outcomes in standard deviations (95% Confidence Interval) between children whose mothers consumed 1-1.9, 2-2.9, 3-3.9, 4-4.9, and ≥5 glasses of milk per day, respectively, as compared to those whose mothers consumed 0-0.9 glasses of milk per day

<sup>2</sup>1 glass is equivalent to 150 mL milk.

<sup>3</sup>The models are adjusted for child's sex, child's age at follow-up measurement, maternal smoking, maternal vomiting, maternal total energy intake and either gestational age-adjusted birth weight (A), breastfeeding (B) or child's milk intake (C).

<sup>4</sup>*P*-values for trend were obtained from models in which the categorized milk intake variable was entered as continuous variable.

<sup>5</sup> Not applicable: secondary analysis not performed as results from primary analysis are not linear.

\**P*-value < 0.05 \*\**P*-value < 0.0125 (Bonferroni corrected *P*-value)

**Supplemental Table 5. Associations of maternal first trimester milk intake with childhood pericardial fat at the age of 10 years** <sup>1,2,3</sup>

| Pericardial fat mass index (SD)                                    |                                |     |                       |     |                        |     |
|--------------------------------------------------------------------|--------------------------------|-----|-----------------------|-----|------------------------|-----|
|                                                                    | Total group<br><i>n</i> =1,269 |     | Boys<br><i>n</i> =626 |     | Girls<br><i>n</i> =643 |     |
| <b>A. Confounder model + gestational age-adjusted birth weight</b> |                                |     |                       |     |                        |     |
| 0-0.9 glass                                                        | Reference                      | 346 | Reference             | 165 | Reference              | 181 |
| 1-1.9 glasses                                                      | -0.02 (-0.17, 0.14)            | 336 | -0.24 (-0.46, -0.02)* | 160 | 0.17 (-0.04, 0.37)     | 176 |
| 2-2.9 glasses                                                      | 0.00 (-0.15, 0.15)             | 356 | -0.11 (-0.32, 0.10)   | 191 | 0.08 (-0.13, 0.49)     | 165 |
| 3-3.9 glasses                                                      | -0.07 (-0.27, 0.14)            | 140 | -0.34 (-0.64, -0.05)* | 70  | 0.19 (-0.09, 0.47)     | 70  |
| 4-4.9 glasses                                                      | 0.04 (-0.29, 0.38)             | 39  | -0.67 (-1.26, -0.07)* | 12  | 0.40 (0.00, 0.78)      | 27  |
| ≥5 glasses                                                         | 0.26 (-0.04, 0.56)             | 52  | -0.07 (-0.48, 0.34)   | 28  | 0.57 (0.15, 1.00)**    | 24  |
| <i>P</i> for trend <sup>4</sup>                                    | NA <sup>5</sup>                |     | NA <sup>5</sup>       |     | 0.010**                |     |
| <b>B. Confounder model + breastfeeding</b>                         |                                |     |                       |     |                        |     |
| 0-0.9 glass                                                        | Reference                      | 346 | Reference             | 165 | Reference              | 181 |
| 1-1.9 glasses                                                      | 0.01 (-0.14, 0.16)             | 336 | -0.23 (-0.44, 0.00)*  | 160 | 0.20 (-0.01, 0.40)     | 176 |
| 2-2.9 glasses                                                      | 0.02 (-0.13, 0.17)             | 356 | -0.10 (-0.31, 0.11)   | 191 | 0.12 (-0.09, 0.33)     | 165 |
| 3-3.9 glasses                                                      | -0.03 (-0.24, 0.17)            | 140 | -0.33 (-0.62, -0.04)* | 70  | 0.24 (-0.03, 0.52)     | 70  |
| 4-4.9 glasses                                                      | 0.04 (-0.3, 0.37)              | 39  | -0.67 (-1.27, -0.08)* | 12  | 0.40 (0.00, 0.80)      | 27  |
| ≥5 glasses                                                         | 0.30 (0.00, 0.60)              | 52  | -0.05 (-0.47, 0.36)   | 28  | 0.65 (0.22, 1.08)**    | 24  |
| <i>P</i> for trend <sup>4</sup>                                    | NA <sup>5</sup>                |     | NA <sup>5</sup>       |     | 0.003**                |     |
| <b>C. Confounder model + child's milk intake</b>                   |                                |     |                       |     |                        |     |
| 0-0.9 glass                                                        | Reference                      | 346 | Reference             | 165 | Reference              | 181 |
| 1-1.9 glasses                                                      | 0.00 (-0.15, 0.15)             | 336 | -0.23 (-0.45, 0.00)*  | 160 | 0.19 (-0.01, 0.40)     | 176 |
| 2-2.9 glasses                                                      | 0.02 (-0.13, 0.17)             | 356 | -0.10 (-0.31, 0.11)   | 191 | 0.11 (-0.10, 0.32)     | 165 |
| 3-3.9 glasses                                                      | -0.04 (-0.24, 0.16)            | 140 | -0.33 (-0.63, -0.04)* | 70  | 0.23 (-0.05, 0.50)     | 70  |
| 4-4.9 glasses                                                      | 0.05 (-0.28, 0.39)             | 39  | -0.66 (-1.25, -0.05)* | 12  | 0.40 (0.00, 0.81)*     | 27  |
| ≥5 glasses                                                         | 0.29 (-0.01, 0.59)             | 52  | -0.05 (-0.47, 0.36)   | 28  | 0.63 (0.20, 1.06)**    | 24  |
| <i>P</i> for trend <sup>4</sup>                                    | NA <sup>5</sup>                |     | NA <sup>5</sup>       |     | 0.004**                |     |

<sup>1</sup>Values are differences in childhood outcomes in standard deviations (95% Confidence Interval) between children whose mothers consumed 1-1.9, 2-2.9, 3-3.9, 4-4.9, and ≥5 glasses of milk per day, respectively, as compared to those whose mothers consumed 0-0.9 glasses of milk per day.

<sup>2</sup>1 glass is equivalent to 150 mL milk.

<sup>3</sup>The models are adjusted for child's sex, child's age at follow-up measurement, maternal smoking, maternal vomiting, maternal total energy intake and either gestational age-adjusted birth weight (A), breastfeeding (B) or child's milk intake (C).

<sup>4</sup>*P*-values for trend were obtained from models in which the categorized milk intake variable was entered as continuous variable.

<sup>5</sup> Not applicable: secondary analysis not performed as results from primary analysis are not linear.

\**P*-value < 0.05 \*\**P*-value < 0.0125 (Bonferroni corrected *P*-value)



**Supplemental Table 6. Associations of maternal first trimester milk intake with childhood fat and lean mass at the age of 10 years** <sup>1,2,3</sup>

|                                 | Body mass index (SD) |          | Fat mass index (SD) |          | Lean mass index (SD) |          | Android/gynoid fat mass ratio (SD) |          | Abdominal visceral fat mass index (SD) |          | Liver fat fraction (SD) |          |
|---------------------------------|----------------------|----------|---------------------|----------|----------------------|----------|------------------------------------|----------|----------------------------------------|----------|-------------------------|----------|
|                                 | <i>n</i> =2,461      | <i>n</i> | <i>n</i> =2,433     | <i>n</i> | <i>n</i> =2,443      | <i>n</i> | <i>n</i> =2,436                    | <i>n</i> | <i>n</i> =1,238                        | <i>n</i> | <i>n</i> =1,386         | <i>n</i> |
| <b>Maternal milk intake</b>     |                      |          |                     |          |                      |          |                                    |          |                                        |          |                         |          |
| 0-0.9 glass                     | Reference            | 798      | Reference           | 786      | Reference            | 786      | Reference                          | 787      | Reference                              | 409      | Reference               | 460      |
| 1-1.9 glasses                   | 0.07 (-0.03, 0.17)   | 561      | 0.04 (-0.06, 0.14)  | 556      | 0.06 (-0.04, 0.16)   | 556      | 0.02 (-0.08, 0.13)                 | 557      | -0.02 (-0.16, 0.13)                    | 295      | -0.07 (-0.21, 0.08)     | 324      |
| 2-2.9 glasses                   | 0.10 (0.01, 0.19)*   | 806      | 0.09 (-0.01, 0.18)  | 801      | 0.06 (-0.04, 0.15)   | 801      | 0.05 (-0.05, 0.14)                 | 802      | 0.03 (-0.11, 0.17)                     | 385      | 0.05 (-0.09, 0.18)      | 433      |
| 3-3.9 glasses                   | 0.11 (-0.06, 0.29)   | 130      | 0.07 (-0.11, 0.24)  | 127      | 0.15 (-0.03, 0.32)   | 127      | -0.01 (-0.19, 0.18)                | 127      | -0.02 (-0.27, 0.22)                    | 74       | -0.04 (-0.27, 0.2)      | 82       |
| 4-4.9 glasses                   | 0.23 (0.04, 0.43)*   | 101      | 0.29 (0.09, 0.49)** | 99       | 0.10 (-0.1, 0.29)    | 99       | 0.18 (-0.03, 0.39)                 | 99       | 0.16 (-0.16, 0.48)                     | 41       | 0.32 (0.02, 0.61)*      | 49       |
| ≥5 glasses                      | 0.29 (0.06, 0.53)*   | 65       | 0.28 (0.04, 0.52)*  | 64       | 0.24 (0.00, 0.48)*   | 64       | 0.18 (-0.07, 0.44)                 | 64       | 0.40 (0.05, 0.75)*                     | 34       | 0.11 (-0.22, 0.45)      | 38       |
| <i>P</i> for trend <sup>4</sup> | <0.001**             |          | 0.001**             |          | NA <sup>5</sup>      |          | NA <sup>5</sup>                    |          | NA <sup>5</sup>                        |          | NA <sup>5</sup>         |          |

<sup>1</sup>Values are differences in childhood outcomes in standard deviations (95% Confidence Interval) between children whose mothers consumed 1-1.9, 2-2.9, 3-3.9, 4-4.9, and ≥5 glasses of milk per day (milk drinks excluded), respectively, as compared to those whose mothers consumed 0-0.9 glasses of milk per day.

<sup>3</sup>The models are adjusted for child's sex, child's age at follow-up measurement, maternal smoking, maternal vomiting and maternal total energy intake.

<sup>4</sup>*P*-values for trend were obtained from models in which the categorized milk intake variable was entered as continuous variable.

<sup>5</sup> Not applicable: secondary analysis not performed as results from primary analysis are not linear.

\**P*-value < 0.05 \*\**P*-value < 0.0125 (Bonferroni corrected *P*-value)

**Supplemental Table 7. Associations of maternal first trimester milk intake with childhood fat and lean mass at the age of 10 years** <sup>1,2,3</sup>

|                                 | Body mass index (SD) |          | Fat mass index (SD) |          | Lean mass index (SD) |          | Android/gynoid fat mass ratio (SD) |          | Abdominal visceral fat mass index (SD) |          | Liver fat fraction (SD) |          |
|---------------------------------|----------------------|----------|---------------------|----------|----------------------|----------|------------------------------------|----------|----------------------------------------|----------|-------------------------|----------|
|                                 | <i>n</i> =2,461      | <i>n</i> | <i>n</i> =2,433     | <i>n</i> | <i>n</i> =2,443      | <i>n</i> | <i>n</i> =2,436                    | <i>n</i> | <i>n</i> =1,238                        | <i>n</i> | <i>n</i> =1,386         | <i>n</i> |
| <b>Maternal milk intake</b>     |                      |          |                     |          |                      |          |                                    |          |                                        |          |                         |          |
| 0-0.9 glass                     | Reference            | 662      | Reference           | 651      | Reference            | 651      | Reference                          | 652      | Reference                              | 339      | Reference               | 380      |
| 1-1.9 glasses                   | 0.11 (0.01, 0.21)*   | 637      | 0.09 (-0.02, 0.19)  | 631      | 0.06 (-0.04, 0.16)   | 631      | 0.09 (-0.02, 0.20)                 | 632      | 0.00 (-0.15, 0.14)                     | 330      | -0.01 (-0.15, 0.13)     | 368      |
| 2-2.9 glasses                   | 0.13 (0.03, 0.23)**  | 691      | 0.12 (0.02, 0.22)*  | 687      | 0.06 (-0.04, 0.16)   | 687      | 0.08 (-0.03, 0.18)                 | 687      | 0.07 (-0.08, 0.22)                     | 336      | 0.09 (-0.05, 0.23)      | 379      |
| ≥3 glasses                      | 0.17 (0.06, 0.29)**  | 471      | 0.19 (0.07, 0.30)** | 464      | 0.07 (-0.04, 0.19)   | 464      | 0.13 (0.01, 0.26)*                 | 465      | 0.09 (-0.08, 0.27)                     | 233      | 0.11 (-0.05, 0.28)      | 259      |
| <i>P</i> for trend <sup>4</sup> | 0.003**              |          | 0.001**             |          | NA <sup>5</sup>      |          | NA <sup>5</sup>                    |          | NA <sup>5</sup>                        |          | NA <sup>5</sup>         |          |

<sup>1</sup>Values are differences in childhood outcomes in standard deviations (95% Confidence Interval) between children whose mothers consumed 1-1.9, 2-2.9, and ≥3 glasses of milk per day, respectively, as compared to those whose mothers consumed 0-0.9 glasses of milk per day.

<sup>2</sup>1 glass is equivalent to 150 mL milk.

<sup>3</sup>The models are adjusted for child's sex, child's age at follow-up measurement, maternal smoking, maternal vomiting and maternal total energy intake.

<sup>4</sup>*P*-values for trend were obtained from models in which the categorized milk intake variable was entered as continuous variable.

<sup>5</sup> Not applicable: secondary analysis not performed as results from primary analysis are not linear.

\**P*-value < 0.05 \*\**P*-value < 0.0125 (Bonferroni corrected *P*-value)

**Supplemental Table 8. Associations of maternal first trimester cheese intake with childhood fat and lean mass at the age of 10 years** <sup>1,2</sup>

|                               | Body mass index (SD)  |          | Fat mass index (SD)    |          | Lean mass index (SD) |          | Android/gynoid fat mass ratio (SD) |          | Abdominal visceral fat mass index (SD) |          | Liver fat fraction (SD) |          |
|-------------------------------|-----------------------|----------|------------------------|----------|----------------------|----------|------------------------------------|----------|----------------------------------------|----------|-------------------------|----------|
|                               | <i>n</i> =2,461       | <i>n</i> | <i>n</i> =2,433        | <i>n</i> | <i>n</i> =2,443      | <i>n</i> | <i>n</i> =2,436                    | <i>n</i> | <i>n</i> =1,238                        | <i>n</i> | <i>n</i> =1,386         | <i>n</i> |
| <b>Maternal cheese intake</b> |                       |          |                        |          |                      |          |                                    |          |                                        |          |                         |          |
| 1 <sup>st</sup> quartile      | Reference             | 615      | Reference              | 612      | Reference            | 612      | Reference                          | 613      | Reference                              | 252      | Reference               | 252      |
| 2 <sup>nd</sup> quartile      | -0.07 (-0.17, 0.03)   | 617      | -0.13 (-0.24, -0.03)** | 608      | 0.07 (-0.03, 0.17)   | 608      | -0.10 (-0.21, 0.01)                | 608      | -0.13 (-0.29, 0.04)                    | 306      | -0.33 (-0.48, -0.18)**  | 306      |
| 3 <sup>rd</sup> quartile      | -0.12 (-0.23, -0.01)* | 614      | -0.23 (-0.33, -0.12)** | 607      | 0.11 (0.00, 0.22)    | 607      | -0.22 (-0.33, -0.11)**             | 609      | -0.21 (-0.38, -0.05)**                 | 337      | -0.26 (-0.42, -0.11)**  | 337      |
| 4 <sup>th</sup> quartile      | -0.12 (-0.23, -0.01)* | 615      | -0.21 (-0.32, -0.10)** | 606      | 0.10 (-0.01, 0.21)   | 606      | -0.18 (-0.29, -0.06)**             | 606      | -0.31 (-0.48, -0.15)**                 | 343      | -0.25 (-0.40, -0.09)**  | 343      |

<sup>1</sup>Values are differences in childhood outcomes in standard deviations (95% Confidence Interval) between children whose mothers were in the 2<sup>nd</sup>, 3<sup>rd</sup> and 4<sup>th</sup> quartile of cheese intake, respectively, as compared to those whose mothers were in the 1<sup>st</sup> quartile.

<sup>2</sup>The models are adjusted for child's sex, child's age at follow-up measurement, maternal smoking, maternal vomiting and maternal total energy intake.

\**P*-value < 0.05 \*\**P*-value < 0.0125 (Bonferroni corrected *P*-value)

Supplemental Table 9. Associations of maternal first trimester yoghurt intake with childhood fat and lean mass at the age of 10 years <sup>1,2</sup>

|                                | Body mass index (SD)   |          | Fat mass index (SD)    |          | Lean mass index (SD) |          | Android/gynoid fat mass ratio (SD) |          | Abdominal visceral fat mass index (SD) |          | Liver fat fraction (SD) |          |
|--------------------------------|------------------------|----------|------------------------|----------|----------------------|----------|------------------------------------|----------|----------------------------------------|----------|-------------------------|----------|
|                                | <i>n</i> =2,461        | <i>n</i> | <i>n</i> =2,433        | <i>n</i> | <i>n</i> =2,443      | <i>n</i> | <i>n</i> =2,436                    | <i>n</i> | <i>n</i> =1,238                        | <i>n</i> | <i>n</i> =1,386         | <i>n</i> |
| <b>Maternal yoghurt intake</b> |                        |          |                        |          |                      |          |                                    |          |                                        |          |                         |          |
| 1 <sup>st</sup> quartile       | Reference              | 666      | Reference              | 656      | Reference            | 656      | Reference                          | 657      | Reference                              | 320      | Reference               | 363      |
| 2 <sup>nd</sup> quartile       | 0.01 (-0.10, 0.12)     | 522      | 0.01 (-0.10, 0.12)     | 518      | -0.01 (-0.12, 0.10)  | 518      | 0.02 (-0.1, 0.13)                  | 519      | 0.00 (-0.17, 0.16)                     | 256      | 0.19 (0.04, 0.35)*      | 293      |
| 3 <sup>rd</sup> quartile       | -0.23 (-0.33, -0.13)** | 711      | -0.25 (-0.35, -0.15)** | 702      | -0.09 (-0.19, 0.01)  | 702      | -0.17 (-0.28, -0.06)**             | 702      | -0.23 (-0.38, -0.08)**                 | 358      | -0.07 (-0.21, 0.08)     | 396      |
| 4 <sup>th</sup> quartile       | -0.15 (-0.26, -0.04)** | 562      | -0.18 (-0.29, -0.08)** | 557      | -0.07 (-0.18, 0.04)  | 557      | -0.11 (-0.22, 0.00)                | 558      | -0.17 (-0.33, -0.01)*                  | 304      | -0.03 (-0.18, 0.12)     | 334      |

<sup>1</sup>Values are differences in childhood outcomes in standard deviations (95% Confidence Interval) between children whose mothers were in the 2<sup>nd</sup>, 3<sup>rd</sup> and 4<sup>th</sup> quartile of yoghurt intake, respectively, as compared to those whose mothers were in the 1<sup>st</sup> quartile.

<sup>2</sup>The models are adjusted for child's sex, child's age at follow-up measurement, maternal smoking, maternal vomiting and maternal total energy intake.

\**P*-value < 0.05 \*\**P*-value < 0.0125 (Bonferroni corrected *P*-value)

**Supplemental Table 10. Associations of maternal first trimester milk intake with childhood blood pressure at the age of 10 years**<sup>1,2,3</sup>

|                                 | Systolic blood pressure (SD) |          | Diastolic blood pressure (SD) |          |
|---------------------------------|------------------------------|----------|-------------------------------|----------|
|                                 | <i>n</i> =2,379              | <i>n</i> | <i>n</i> =2,379               | <i>n</i> |
| <b>Maternal milk intake</b>     |                              |          |                               |          |
| 0-0.9 glass                     | Reference                    | 635      | Reference                     | 635      |
| 1-1.9 glasses                   | 0.03 (-0.08, 0.14)           | 616      | 0.03 (-0.08, 0.14)            | 616      |
| 2-2.9 glasses                   | 0.07 (-0.03, 0.18)           | 667      | 0.09 (-0.02, 0.20)            | 667      |
| 3-3.9 glasses                   | 0.09 (-0.05, 0.23)           | 263      | 0.07 (-0.07, 0.21)            | 263      |
| 4-4.9 glasses                   | 0.10 (-0.12, 0.31)           | 92       | 0.03 (-0.19, 0.24)            | 92       |
| ≥5 glasses                      | 0.22 (0.01, 0.42)*           | 106      | 0.21 (0.01, 0.42)*            | 106      |
| <i>P</i> for trend <sup>4</sup> | 0.019*                       |          | 0.046*                        |          |

<sup>1</sup>Values are differences in childhood outcomes in standard deviations (95% Confidence Interval) between children whose mothers consumed 1-1.9, 2-2.9, 3-3.9, 4-4.9, and ≥5 glasses of milk per day, respectively, as compared to those whose mothers consumed 0-0.9 glasses of milk per day.

<sup>2</sup>1 glass is equivalent to 150 mL milk.

<sup>3</sup>The models are adjusted for child's sex and child's age at follow-up measurement.

<sup>4</sup>*P*-values for trend were obtained from models in which the categorized milk intake variable was entered as continuous variable.

\**P*-value < 0.05 \*\**P*-value < 0.0125 (Bonferroni corrected *P*-value)

**Supplemental Table 11. Associations of maternal first trimester milk intake with childhood metabolic outcomes at the age of 10 years**<sup>1,2,3</sup>

|                             | Total cholesterol (SD)<br><i>n</i> =1,718 |          | HDL cholesterol (SD)<br><i>n</i> =1,705 |          | LDL cholesterol (SD)<br><i>n</i> =1,698 |          | Triglycerides (SD)<br><i>n</i> =1,701 |          | Insulin (SD)<br><i>n</i> =1,703 |          | Glucose (SD)<br><i>n</i> =1,704 |          |
|-----------------------------|-------------------------------------------|----------|-----------------------------------------|----------|-----------------------------------------|----------|---------------------------------------|----------|---------------------------------|----------|---------------------------------|----------|
|                             |                                           | <i>n</i> |                                         | <i>n</i> |                                         | <i>n</i> |                                       | <i>n</i> |                                 | <i>n</i> |                                 | <i>n</i> |
| <b>Maternal milk intake</b> |                                           |          |                                         |          |                                         |          |                                       |          |                                 |          |                                 |          |
| 0-0.9 glass                 | Reference                                 | 488      | Reference                               | 447      | Reference                               | 445      | Reference                             | 446      | Reference                       | 477      | Reference                       | 477      |
| 1-1.9 glasses               | -0.01 (-0.14, 0.12)                       | 452      | -0.05 (-0.18, 0.08)                     | 453      | 0.00 (-0.13, 0.13)                      | 449      | 0.08 (-0.05, 0.22)                    | 450      | 0.04 (-0.09, 0.17)              | 451      | 0.05 (-0.08, 0.18)              | 453      |
| 2-2.9 glasses               | -0.03 (-0.15, 0.10)                       | 486      | -0.08 (-0.20, 0.05)                     | 487      | 0.00 (-0.12, 0.13)                      | 486      | 0.09 (-0.04, 0.21)                    | 487      | -0.11 (-0.24, 0.02)             | 487      | 0.07 (-0.06, 0.20)              | 487      |
| 3-3.9 glasses               | 0.00 (-0.17, 0.17)                        | 188      | -0.04 (-0.21, 0.13)                     | 188      | 0.05 (-0.12, 0.22)                      | 188      | 0.03 (-0.14, 0.20)                    | 188      | -0.08 (-0.25, 0.09)             | 188      | 0.06 (-0.11, 0.23)              | 188      |
| 4-4.9 glasses               | -0.01 (-0.28, 0.27)                       | 57       | 0.00 (-0.28, 0.27)                      | 57       | -0.06 (-0.33, 0.22)                     | 57       | 0.12 (-0.15, 0.40)                    | 57       | -0.05 (-0.33, 0.22)             | 57       | 0.25 (-0.03, 0.52)              | 57       |
| ≥5 glasses                  | -0.03 (-0.27, 0.22)                       | 73       | -0.06 (-0.31, 0.19)                     | 73       | 0.03 (-0.21, 0.27)                      | 73       | 0.01 (-0.23, 0.26)                    | 73       | -0.01 (-0.26, 0.24)             | 73       | -0.14 (-0.39, 0.11)             | 72       |

<sup>1</sup>Values are differences in childhood outcomes in standard deviations (95% Confidence Interval) between children whose mothers consumed 1-1.9, 2-2.9, 3-3.9, 4-4.9, and ≥5 glasses of milk per day, respectively, as compared to those whose mothers consumed 0-0.9 glasses of milk per day.

<sup>2</sup>1 glass is equivalent to 150 mL milk.

<sup>3</sup>The models are adjusted for child's sex and child's age at follow-up measurement.

**Supplemental Figure 2. Associations of maternal first trimester milk intake with the risk of childhood overweight/obesity and clustering of cardio-metabolic risk factors at the age of 10 years**

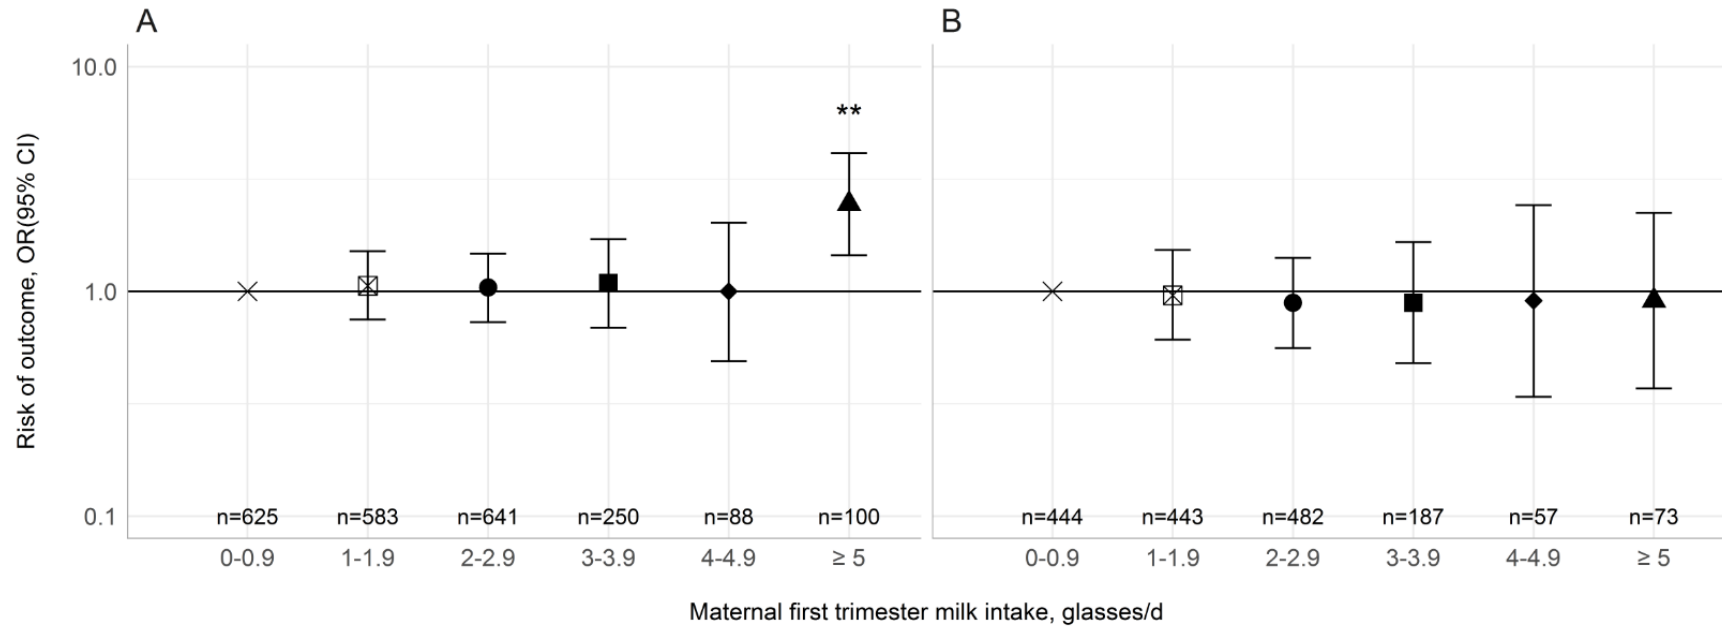

Values are odds ratio's (95% Confidence Interval) that reflect the risk of overweight/obesity (A) or clustering of cardio-metabolic risk factors (B) in children whose mothers consumed 1-1.9, 2-2.9, 3-3.9, 4-4.9, and  $\geq 5$  glasses of milk per day, respectively, as compared to those whose mothers consumed 0-0.9 glasses of milk per day. 1 glass is equivalent to 150 mL milk. The models are adjusted for child's sex and child's age at follow-up measurement. *P*-values for trend were obtained from models in which the categorized milk intake variable was entered as continuous variable. \**P*-value < 0.05 \*\**P*-value < 0.0125 (Bonferroni corrected *P*-value)
